# Supplementary material for: Differential Distribution of Salmonella Serovars and Campylobacter spp. Isolates in Free-Living Crows and Broiler Chickens in Aomori, Japan
Source: PubMed Central journal article supplement (PMC5877346; doi:10.1264/jsme2.me17183), 2018-03-29
Supplement: 33_77_s1.pdf [file 33_77_s1.pdf]

Supplemental table. MLST profiles of the *C. jejuni* isolates from crows and broilers with similar PFGE patterns.

| ID of Isolates | PFGE patterns | ST   | Clonal complex  | MLST profiles |      |      |      |     |     |      |
|----------------|---------------|------|-----------------|---------------|------|------|------|-----|-----|------|
|                |               |      |                 | aspA          | glnA | gltA | glyA | pgm | tkf | uncA |
| Crow           |               |      |                 |               |      |      |      |     |     |      |
| 62217          | Ma            | 2761 | ST-952 complex  | 18            | 22   | 72   | 98   | 205 | 301 | 16   |
| 62221          | N             | 9010 | -               | 64            | 288  | 71   | 189  | 43  | 109 | 60   |
| 62220          | Ob            | 1540 | ST-1275 complex | 76            | 33   | 22   | 104  | 43  | 109 | 31   |
| Broiler        |               |      |                 |               |      |      |      |     |     |      |
| 62218          | 362           | 22   | ST-22 complex   | 1             | 3    | 6    | 4    | 3   | 3   | 3    |
| 62219          | 464           | 3727 | ST-45 complex   | 48            | 7    | 10   | 4    | 183 | 7   | 1    |
